# Supplementary material
Source: PubMed Central journal article supplement (PMC4361732)
Supplement: NIHMS62361-supplement-Supplementary.pdf [file NIHMS62361-supplement-Supplementary.pdf]

Immunity

Supplemental Information

## **Binding of the Fap2 Protein of *Fusobacterium***

### ***nucleatum* to Human Inhibitory Receptor**

## **TIGIT Protects Tumors from Immune Cell Attack**

Chamutal Gur, Yara Ibrahim, Batya Isaacson, Rachel Yamin, Jawad Abed, Moriya Gamliel, Jonatan Enk, Yotam Bar-On, Noah Stanietsky-Kaynan, Shunit Copenhagen-Glazer, Noam Shussman, Gideon Almogy, Angelica Cuapio, Erhard Hofer, Dror Mevorach, Adi Tabib, Rona Ortenberg, Gal Markel, Karmela Miklić, Stipan Jonjic, Caitlin A. Brennan, Wendy S. Garrett, Gilad Bachrach, and Ofer Mandelboim

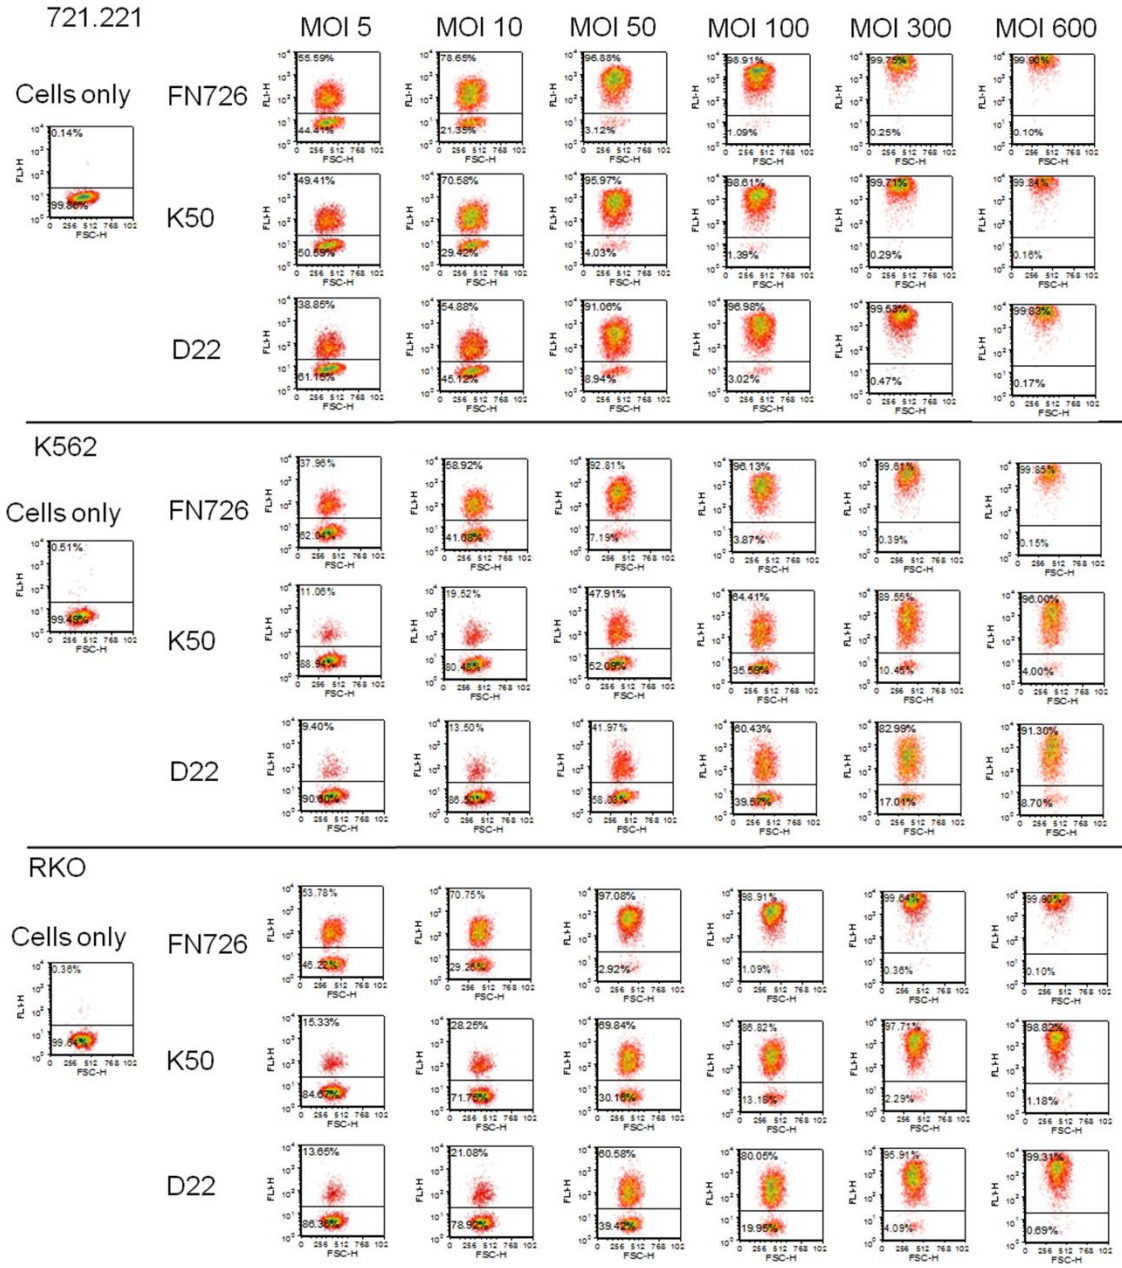

Supp. Figure 1

Figure S1, associated with figure 5C.

Fap2 is involved in the attachment of *Fusobacterium nucleatum* to certain tumors

Flow cytometry of FITC-labeled wild type *F. nucleatum* 726 bacterium and mutants K50 and D22 (right dot plots, each row represents binding of different strains of *F. nucleatum*, indicated on the right) to 721.221 cells (A), to K562 cells (B) and to RKO cells (C). Bacteria were incubated with cell lines at various bacteria to cell line ratio (indicated at the top of the figure). The left dot blot shows unbound 721.221 cells (A), K562 cells (B) and RKO cells (C). The percentages of binding are indicated in the figure. Figure shows one representative experiment out of 3 performed.
